# Supplementary material
Source: MDPI journal article supplement (https://www.mdpi.com/2071-1050/14/10/5904)
Supplement: s1 [file s1]

## Supplementary Materials

**Table S1.** Life Cycle Impact Assessment considering the mortar with 0% of OSPW and cement type CPV.

| Categoria de Impacte                    | Unit                     | Totalt                   | CPV Cement                | Conveyor Belt              | Electricity               | Industrial Machine        | Packing. Cement          | Sand                     |
|-----------------------------------------|--------------------------|--------------------------|---------------------------|----------------------------|---------------------------|---------------------------|--------------------------|--------------------------|
| Global warming                          | kg CO <sub>2</sub> eq    | 0.1813491                | 0.136260213               | 4.3162 × 10 <sup>5</sup>   | 5.9466 × 10 <sup>7</sup>  | 1.5966 × 10 <sup>5</sup>  | 0.0095821                | 0.03544706               |
| Stratospheric ozone depletion           | kg CFC11 eq              | 2.5194 × 10 <sup>8</sup> | 1.02752 × 10 <sup>8</sup> | 1.24141 × 10 <sup>11</sup> | 1.5492 × 10 <sup>12</sup> | 5.9831 × 10 <sup>12</sup> | 3.5166 × 10 <sup>9</sup> | 1.1382 × 10 <sup>8</sup> |
| Ionizing radiation                      | kBq Co-60 eq             | 0.00176875               | 0.000752016               | 1.81884 × 10 <sup>6</sup>  | 5.1456 × 10 <sup>8</sup>  | 8.5558 × 10 <sup>7</sup>  | 0.00026569               | 0.00074832               |
| Ozone formation. Human health           | kg NO <sub>x</sub> eq    | 0.00036976               | 0.000213189               | 1.02948 × 10 <sup>7</sup>  | 8.6011 × 10 <sup>10</sup> | 4.2635 × 10 <sup>8</sup>  | 1.4336 × 10 <sup>5</sup> | 0.00014209               |
| Fine particulate matter formation       | kg PM <sub>2.5</sub> eq  | 0.0001639                | 7.90046 × 10 <sup>5</sup> | 8.78412 × 10 <sup>8</sup>  | 9.1375 × 10 <sup>10</sup> | 4.2899 × 10 <sup>8</sup>  | 1.1436 × 10 <sup>5</sup> | 7.3329 × 10 <sup>5</sup> |
| Ozone formation. Terrestrial ecosystems | kg NO <sub>x</sub> eq    | 0.00037443               | 0.000215219               | 1.07799 × 10 <sup>7</sup>  | 8.7392 × 10 <sup>10</sup> | 4.4465 × 10 <sup>8</sup>  | 1.4844 × 10 <sup>5</sup> | 0.00014422               |
| Terrestrial acidification               | kg SO <sub>2</sub> eq    | 0.00040068               | 0.00019867                | 1.32282 × 10 <sup>7</sup>  | 1.8995 × 10 <sup>9</sup>  | 8.0209 × 10 <sup>8</sup>  | 1.3745 × 10 <sup>5</sup> | 0.00018805               |
| Freshwater eutrophication               | kg P eq                  | 2.0521 × 10 <sup>5</sup> | 1.034 × 10 <sup>5</sup>   | 3.20799 × 10 <sup>8</sup>  | 1.5427 × 10 <sup>10</sup> | 1.9126 × 10 <sup>8</sup>  | 1.3061 × 10 <sup>6</sup> | 8.8232 × 10 <sup>6</sup> |
| Marine eutrophication                   | kg N eq                  | 2.4625 × 10 <sup>6</sup> | 6.6089 × 10 <sup>7</sup>  | 1.21564 × 10 <sup>9</sup>  | 1.0636 × 10 <sup>11</sup> | 9.1251 × 10 <sup>10</sup> | 1.231 × 10 <sup>6</sup>  | 5.6848 × 10 <sup>7</sup> |
| Terrestrial ecotoxicity                 | kg 1,4-DCB               | 0.22557415               | 0.064117632               | 0.000233769                | 8.1859 × 10 <sup>7</sup>  | 0.00028064                | 0.01472912               | 0.14621217               |
| Freshwater ecotoxicity                  | kg 1,4-DCB               | 0.00142172               | 0.000580212               | 4.95232 × 10 <sup>6</sup>  | 1.3641 × 10 <sup>8</sup>  | 2.9836 × 10 <sup>6</sup>  | 0.00020439               | 0.00062917               |
| Marine ecotoxicity                      | kg 1,4-DCB               | 0.00206863               | 0.000830188               | 6.97044 × 10 <sup>6</sup>  | 1.794 × 10 <sup>8</sup>   | 4.2584 × 10 <sup>6</sup>  | 0.00028718               | 0.00094001               |
| Human carcinogenic toxicity             | kg 1,4-DCB               | 0.00229859               | 0.00103429                | 2.84795 × 10 <sup>5</sup>  | 1.2491 × 10 <sup>8</sup>  | 1.1112 × 10 <sup>5</sup>  | 0.00017978               | 0.00104491               |
| Human non-carcinogenic toxicity         | kg 1,4-DCB               | 0.0466397                | 0.018114131               | 0.00014667                 | 1.8902 × 10 <sup>7</sup>  | 9.68 × 10 <sup>5</sup>    | 0.00704217               | 0.02123974               |
| Land use                                | m <sup>2</sup> a crop eq | 0.00886759               | 0.000524948               | 8.19979 × 10 <sup>7</sup>  | 3.2944 × 10 <sup>9</sup>  | 3.6663 × 10 <sup>7</sup>  | 0.00674001               | 0.00160144               |
| Mineral resource scarcity               | kg Cu eq                 | 0.00078007               | 0.000716919               | 1.69136 × 10 <sup>6</sup>  | 4.928 × 10 <sup>10</sup>  | 7.5016 × 10 <sup>7</sup>  | 8.0297 × 10 <sup>6</sup> | 5.2683 × 10 <sup>5</sup> |
| Fossil resource scarcity                | kg oil eq                | 0.02079447               | 0.010924265               | 9.14376 × 10 <sup>6</sup>  | 1.3648 × 10 <sup>7</sup>  | 3.4009 × 10 <sup>6</sup>  | 0.00102539               | 0.00883214               |
| Water consumption                       | m <sup>3</sup>           | 0.00160024               | 0.000259002               | 5.60071 × 10 <sup>7</sup>  | 5.3877 × 10 <sup>8</sup>  | 2.0441 × 10 <sup>7</sup>  | 9.2755 × 10 <sup>5</sup> | 0.00124766               |

**Table S2.** Life Cycle Impact Assessment considering the mortar with 30% of OSPW and cement type CPV.

| <b>Categoria de Impacte</b>             | <b>Unidade</b>           | <b>Total</b>         | <b>CPV<br/>Cement.</b> | <b>Conveyor<br/>Belt</b> | <b>Electricity</b>      | <b>Industrial<br/>Machine</b> | <b>Packing.<br/>Cement</b> | <b>Sand</b>          | <b>OSPW</b>             |
|-----------------------------------------|--------------------------|----------------------|------------------------|--------------------------|-------------------------|-------------------------------|----------------------------|----------------------|-------------------------|
| Global warming                          | kg CO <sub>2</sub> eq    | 0.1708662            | 0.13626021             | $4.3162 \times 10^5$     | $5.9466 \times 10^7$    | $1.5966 \times 10^5$          | 0.0095821                  | 0.02481294           | 0.00015122              |
| Stratospheric ozone depletion           | kg CFC11 eq              | $2.1867 \times 10^8$ | $1.0275 \times 10^8$   | $1.2414 \times 10^{11}$  | $1.5492 \times 10^{12}$ | $5.9831 \times 10^{12}$       | $3.5166 \times 10^9$       | $7.9676 \times 10^9$ | $8.7894 \times 10^{11}$ |
| Ionizing radiation                      | kBq Co-60 eq             | 0.00154741           | 0.00075202             | $1.8188 \times 10^6$     | $5.1456 \times 10^8$    | $8.5558 \times 10^7$          | 0.00026569                 | 0.00052383           | $3.1517 \times 10^6$    |
| Ozone formation. Human health           | kg NO <sub>x</sub> eq    | 0.00032797           | 0.00021319             | $1.0295 \times 10^7$     | $8.6011 \times 10^{10}$ | $4.2635 \times 10^8$          | $1.4336 \times 10^5$       | $9.946 \times 10^5$  | $8.3379 \times 10^7$    |
| Fine particulate matter formation       | kg PM <sub>2.5</sub> eq  | 0.00014212           | $7.9005 \times 10^5$   | $8.7841 \times 10^8$     | $9.1375 \times 10^{10}$ | $4.2899 \times 10^8$          | $1.1436 \times 10^5$       | $5.133 \times 10^5$  | $2.1284 \times 10^7$    |
| Ozone formation. Terrestrial ecosystems | kg NO <sub>x</sub> eq    | 0.00033201           | 0.00021522             | $1.078 \times 10^7$      | $8.7392 \times 10^{10}$ | $4.4465 \times 10^8$          | $1.4844 \times 10^5$       | 0.00010095           | $8.4747 \times 10^7$    |
| Terrestrial acidification               | kg SO <sub>2</sub> eq    | 0.00034477           | 0.00019867             | $1.3228 \times 10^7$     | $1.8995 \times 10^9$    | $8.0209 \times 10^8$          | $1.3745 \times 10^5$       | 0.00013163           | $5.0346 \times 10^7$    |
| Freshwater eutrophication               | kg P eq                  | $1.7886 \times 10^5$ | $1.034 \times 10^5$    | $3.208 \times 10^8$      | $1.5427 \times 10^{10}$ | $1.9126 \times 10^8$          | $1.3061 \times 10^6$       | $6.1762 \times 10^6$ | $1.224 \times 10^8$     |
| Marine eutrophication                   | kg N eq                  | $2.2929 \times 10^6$ | $6.6089 \times 10^7$   | $1.2156 \times 10^9$     | $1.0636 \times 10^{11}$ | $9.1251 \times 10^{10}$       | $1.231 \times 10^6$        | $3.9794 \times 10^7$ | $9.3385 \times 10^{10}$ |
| Terrestrial ecotoxicity                 | kg 1.4-DCB               | 0.18261204           | 0.06411763             | 0.00023377               | $8.1859 \times 10^7$    | 0.00028064                    | 0.01472912                 | 0.10234852           | 0.00090155              |
| Freshwater ecotoxicity                  | kg 1.4-DCB               | 0.00123479           | 0.00058021             | $4.9523 \times 10^6$     | $1.3641 \times 10^8$    | $2.9836 \times 10^6$          | 0.00020439                 | 0.00044042           | $1.8251 \times 10^6$    |
| Marine ecotoxicity                      | kg 1.4-DCB               | 0.00178959           | 0.00083019             | $6.9704 \times 10^6$     | $1.794 \times 10^8$     | $4.2584 \times 10^6$          | 0.00028718                 | 0.00065801           | $2.9661 \times 10^6$    |
| Human carcinogenic toxicity             | kg 1.4-DCB               | 0.0019886            | 0.00103429             | $2.848 \times 10^5$      | $1.2491 \times 10^8$    | $1.1112 \times 10^5$          | 0.00017978                 | 0.00073144           | $3.4904 \times 10^6$    |
| Human non-carcinogenic toxicity         | kg 1.4-DCB               | 0.04033315           | 0.01811413             | 0.00014667               | $1.8902 \times 10^7$    | $9.68 \times 10^5$            | 0.00704217                 | 0.01486782           | $6.537 \times 10^5$     |
| Land use                                | m <sup>2</sup> a crop eq | 0.00839005           | 0.00052495             | $8.1998 \times 10^7$     | $3.2944 \times 10^9$    | $3.6663 \times 10^7$          | 0.00674001                 | 0.00112101           | $2.8903 \times 10^6$    |
| Mineral resource scarcity               | kg Cu eq                 | 0.00076454           | 0.00071692             | $1.6914 \times 10^6$     | $4.928 \times 10^{10}$  | $7.5016 \times 10^7$          | $8.0297 \times 10^6$       | $3.6878 \times 10^5$ | $2.7541 \times 10^7$    |
| Fossil resource scarcity                | kg oil eq                | 0.0181947            | 0.01092427             | $9.1438 \times 10^6$     | $1.3648 \times 10^7$    | $3.4009 \times 10^6$          | 0.00102539                 | 0.0061825            | $4.9867 \times 10^5$    |
| Water consumption                       | m <sup>3</sup>           | 0.0012526            | 0.000259               | $5.6007 \times 10^7$     | $5.3877 \times 10^8$    | $2.0441 \times 10^7$          | $9.2755 \times 10^5$       | 0.00087336           | $2.6664 \times 10^5$    |
